# Supplementary material for: Cardiac and Mental Benefits of Mediterranean-DASH Intervention for Neurodegenerative Delay (MIND) Diet plus Forest Bathing (FB) versus MIND Diet among Older Chinese Adults: A Randomized Controlled Pilot Study
Source: MDPI journal article supplement (doi:10.3390/ijerph192214665), 2022-11-08
Supplement: s1 [file s1]

**Table S1.** Baseline socio-demomgraphic and lifestyle characteristics of study subjects (PP analysis).

|                                       | MIND Group<br>(n=22) | MIND-FB Group<br>(n=25) | Control Group<br>(n=23) | <i>p</i> Value Across All<br>Groups |
|---------------------------------------|----------------------|-------------------------|-------------------------|-------------------------------------|
| Age Group                             |                      |                         |                         | 0.041                               |
| <65 years                             | 9 (39.1)             | 14 (56.0)               | 5 (20.8)                |                                     |
| 65 years or above                     | 14 (60.9)            | 11 (44.0)               | 19 (79.2)               |                                     |
| Gender                                |                      |                         |                         | 0.631                               |
| Female                                | 18 (81.8)            | 19 (76)                 | 17 (70.8)               |                                     |
| Male                                  | 4 (18.2)             | 6 (24)                  | 7 (29.2)                |                                     |
| Educational level                     |                      |                         |                         | 0.092                               |
| Primary or below                      | 8 (36.4)             | 3 (12)                  | 12 (52.2)               |                                     |
| Secondary                             | 9 (40.9)             | 14 (56)                 | 9 (39.1)                |                                     |
| Associate degree                      | 1 (4.5)              | 3 (12)                  | 0 (0)                   |                                     |
| Bachelor degree                       | 1 (4.5)              | 3 (12)                  | 0 (0)                   |                                     |
| Master degree                         | 3 (13.6)             | 2 (8)                   | 1 (4.3)                 |                                     |
| Doctorate degree/PhD degree           | 0 (0)                | 0 (0)                   | 1 (4.3)                 |                                     |
| Current employment                    |                      |                         |                         | 0.499                               |
| Employed Full time                    | 3 (13.6)             | 5 (19.2)                | 4 (17.4)                |                                     |
| Employed Partl time                   | 2 (9.1)              | 2 (7.7)                 | 0 (0)                   |                                     |
| Homemaker                             | 4 (18.2)             | 6 (23.1)                | 3 (13)                  |                                     |
| Retired                               | 13 (59.1)            | 13 (50)                 | 16 (69.6)               |                                     |
| Marital status                        |                      |                         |                         | 0.726                               |
| Married                               | 14 (63.6)            | 15 (60)                 | 12 (52.2)               |                                     |
| Single/ Divorced/ Separated/<br>Widow | 8 (36.4)             | 10 (40)                 | 11 (47.8)               |                                     |
| Frequency for exercise                |                      |                         |                         | 0.243                               |
| 1 to 2 times a week                   | 10 (45.5)            | 14 (56)                 | 8 (34.8)                |                                     |
| 3 to 4 times a week                   | 5 (22.7)             | 5 (20)                  | 6 (26.1)                |                                     |
| 5 to 6 times a week                   | 6 (27.3)             | 3 (12)                  | 9 (39.1)                |                                     |
| Never                                 | 1 (4.5)              | 3 (12)                  | 0 (0)                   |                                     |
| Times for exercise per session        |                      |                         |                         | 0.174                               |
| > 40 minutes                          | 9 (40.9)             | 5 (20)                  | 8 (34.8)                |                                     |
| 30-40 minutes                         | 3 (13.6)             | 9 (36)                  | 3 (13)                  |                                     |
| 20-30 minutes                         | 3 (13.6)             | 3 (12)                  | 8 (34.8)                |                                     |
| 10-20 minutes                         | 3 (13.6)             | 2 (8)                   | 3 (13)                  |                                     |
| <10 minutes                           | 3 (13.6)             | 3 (12)                  | 1 (4.3)                 |                                     |
| Never                                 | 1 (4.5)              | 3 (12)                  | 0 (0)                   |                                     |
| Smoking Habit                         |                      |                         |                         | 0.343                               |
| Smoke 1-10 cigarettes a day           | 1 (4.5)              | 0 (0)                   | 0 (0)                   |                                     |
| Ex-smoker                             | 1 (4.5)              | 0 (0)                   | 0 (0)                   |                                     |

|                                     |                                 |           |          |           |       |
|-------------------------------------|---------------------------------|-----------|----------|-----------|-------|
|                                     | Never                           | 20 (90.9) | 25 (100) | 23 (100)  |       |
| Drinking Habit                      |                                 |           |          |           | 0.291 |
|                                     | More than fourteen times a week | 1 (4.5)   | 0 (0)    | 0 (0)     |       |
|                                     | Five to seven times a week      | 0 (0)     | 1 (4)    | 0 (0)     |       |
|                                     | Once or twice a week            | 1 (4.5)   | 3 (12)   | 0 (0)     |       |
|                                     | Ex-drinker                      | 1 (4.5)   | 0 (0)    | 0 (0)     |       |
|                                     | Never                           | 19 (86.4) | 21 (84)  | 23 (100)  |       |
| Relaxation practice                 |                                 |           |          |           | 0.259 |
|                                     | Yoga                            | 2 (9.1)   | 0 (0)    | 0 (0)     |       |
|                                     | Tai chi or qigong               | 0 (0)     | 0 (0)    | 1 (4.3)   |       |
|                                     | Stretching exercise             | 4 (18.2)  | 5 (20)   | 5 (21.7)  |       |
|                                     | Spend time in nature            | 3 (13.6)  | 5 (20)   | 1 (4.3)   |       |
|                                     | Slow deep breathing             | 3 (13.6)  | 7 (28)   | 4 (17.4)  |       |
|                                     | Mindfulness meditation          | 0 (0)     | 1 (4)    | 2 (8.7)   |       |
|                                     | Listen to music                 | 6 (27.3)  | 5 (20)   | 2 (8.7)   |       |
|                                     | Never                           | 1 (4.5)   | 0 (0)    | 4 (17.4)  |       |
|                                     | Others                          | 3 (13.6)  | 2 (8)    | 4 (17.4)  |       |
| History of Hypertension             |                                 |           |          |           | 0.556 |
|                                     | Hypertension with medication    | 14 (63.6) | 13 (52)  | 14 (60.9) |       |
|                                     | Hypertension without medication | 0 (0)     | 1 (4)    | 1 (4.3)   |       |
|                                     | Pre-hypertension                | 8 (36.4)  | 9 (36)   | 8 (34.8)  |       |
|                                     | Unknown Hypertension            | 0 (0)     | 2 (8)    | 0 (0)     |       |
| No. of antihypertensive drugs taken |                                 |           |          |           | 0.613 |
|                                     | 0                               | 8 (36.4)  | 13 (52)  | 9 (39.1)  |       |
|                                     | 1                               | 8 (36.4)  | 9 (36)   | 8 (34.8)  |       |
|                                     | 2                               | 4 (18.2)  | 1 (4)    | 5 (21.7)  |       |
|                                     | 3                               | 1 (4.5)   | 2 (8)    | 1 (4.3)   |       |
|                                     | 4                               | 1 (4.5)   | 0 (0)    | 0 (0)     |       |

Data are presented as number (%). p-value was calculated by Pearson Chi-Square test; MIND group = The Mediterranean-DASH Intervention for Neurodegenerative Delay diet group; MIND-FB group = The Mediterranean-DASH Intervention for Neurodegenerative Delay (MIND) diet plus forest bathing group; PP: Per-protocol analysis.

**Table S2.** Baseline measures of study subjects (PP analysis for Continuous variables).

|                          |                               | MIND Group<br>(n=22) | MIND-FB<br>Group<br>(n=25) | Control Group<br>(n=23) | <i>p</i> Value<br>Across All<br>Groups | <i>p</i> Value *<br>MIND vs.<br>Control      MIND-FB vs.<br>Control |       |
|--------------------------|-------------------------------|----------------------|----------------------------|-------------------------|----------------------------------------|---------------------------------------------------------------------|-------|
| BMI (kg/m <sup>2</sup> ) |                               | 24.9±3.5             | 24.9±3.3                   | 25.6±2.9                | 0.702                                  | 0.736                                                               | 0.755 |
| Waist to hip<br>ratio    |                               | 0.9±0.04             | 0.89±0.05                  | 0.93±0.05               | 0.013                                  | 0.080                                                               | 0.012 |
| Body fat (%)             |                               | 35.2±6.18            | 35.2±6.9                   | 37.2±5.02               | 0.428                                  | 0.505                                                               | 0.484 |
| Lipid Panel              |                               |                      |                            |                         |                                        |                                                                     |       |
|                          | Total cholesterol<br>(mmol/l) | 5.2±1.2              | 6.0±1.4                    | 5.4±1.2                 | 0.114                                  | 0.856                                                               | 0.298 |
|                          | LDL-cholesterol<br>(mmol/l)   | 2.8±1.1              | 3.4±1.3                    | 2.8±1.2                 | 0.177                                  | 1.000                                                               | 0.236 |
|                          | HDL-cholesterol<br>(mmol/l)   | 1.7±0.5              | 1.7±0.3                    | 1.8±0.3                 | 0.666                                  | 0.933                                                               | 0.644 |
|                          | Triglyceride (mmol/l)         | 1.8±1.1              | 2.1±1.1                    | 2.0±1.2                 | 0.615                                  | 0.864                                                               | 0.886 |
| Glucose<br>(mmol/l)      |                               | 6.0±1.3              | 6.2±1.4                    | 6.4±2.0                 | 0.663                                  | 0.641                                                               | 0.935 |
| BP                       |                               |                      |                            |                         |                                        |                                                                     |       |
|                          | SBP (mmHg)                    | 138.3±14.3           | 141±12.0                   | 140.8±16.8              | 0.792                                  | 0.840                                                               | 0.999 |
|                          | DBP (mmHg)                    | 85.3±10.7            | 88.5±9.0                   | 79.2±8.7                | 0.005                                  | 0.092                                                               | 0.003 |
| Mood state               |                               |                      |                            |                         |                                        |                                                                     |       |
|                          | POMS total (score)            | 38.5±13.3            | 41.8±11.4                  | 42.1±14.3               | 0.590                                  | 0.622                                                               | 0.996 |
|                          | Tension-anxiety               | 4.0±3.0              | 6.2±3.9                    | 5.4±3.7                 | 0.140                                  | 0.429                                                               | 0.745 |
|                          | Depression-dejection          | 3.2±3.1              | 4.2±3.5                    | 4.6±3.6                 | 0.392                                  | 0.382                                                               | 0.927 |
|                          | Fatigue-inertia               | 6.4±3.7              | 6.6±3.7                    | 6.7±3.7                 | 0.977                                  | 0.975                                                               | 0.996 |
|                          | Anger-hostility               | 4.0±2.5              | 4.8±2.6                    | 4.0±2.9                 | 0.449                                  | 0.544                                                               | 0.501 |
|                          | Confusion-<br>bewilderment    | 11.3±3.0             | 10.6±1.5                   | 11.2±3.0                | 0.602                                  | 0.981                                                               | 0.726 |
|                          | Vigor-activity                | 9.6±2.9              | 9.5±3.4                    | 10.1±4.5                | 0.851                                  | 0.897                                                               | 0.857 |
| Anxiety level            |                               |                      |                            |                         |                                        |                                                                     |       |
|                          | STAI-S (score)                | 40.7±8.5             | 38.8±8.5                   | 36.3±7.1                | 0.205                                  | 0.180                                                               | 0.541 |
|                          | STAI-T (score)                | 39.9±9.2             | 42.9±8.9                   | 42.2±9.7                | 0.534                                  | 0.696                                                               | 0.963 |
| MIND diet<br>pattern     |                               |                      |                            |                         |                                        |                                                                     |       |
|                          | Diet scores                   | 5.86±1.9             | 7.0±2.63                   | 7.3±1.9                 | 0.68                                   | 0.068                                                               | 0.848 |

Data are presented as mean±SD. *p*-value were compared with one-way MANOVA. MANOVA = multivariate analysis of variance; BMI = body mass index; BP = blood pressure; MIND group = The Mediterranean-DASH Intervention for Neurodegenerative Delay diet group; MIND-FB group = The Mediterranean-DASH Intervention for Neurodegenerative Delay (MIND) diet plus forest bathing group; DBP = diastolic blood pressure; HDL = high-density lipoprotein; LDL = low-density lipoprotein; PP: Per-protocol analysis; SBP = systolic blood pressure; STAI = State and Trait Anxiety Inventory; POMS = The Profile of Mood States.\* Tukey honest significant difference (HSD).

**Table S3.** Changes in Adiposity, Blood pressure, Cardiovascular Risk factors, mood states, anxiety level and MIND diet score (PP analysis).

| Variable                   | Mean Changes from Baseline to 4 Weeks after Intervention (95% CI) |           |                       |           |                       |           | p Value                 | MIND vs. Control            |           | MIND-FB vs. Control         |           |
|----------------------------|-------------------------------------------------------------------|-----------|-----------------------|-----------|-----------------------|-----------|-------------------------|-----------------------------|-----------|-----------------------------|-----------|
|                            | MIND Group                                                        |           | MIND-FB Group         |           | Control Group         |           | Across<br>All<br>Groups | Mean (95% CI)               |           | Mean (95% CI)               |           |
|                            | (n=22)                                                            | p Value # | (n=25)                | p Value # | (n=23)                | p Value # |                         | Between Group<br>Difference | p Value * | Between Group<br>Difference | p Value * |
|                            |                                                                   |           |                       |           |                       |           |                         |                             |           |                             |           |
| Adiposity                  |                                                                   |           |                       |           |                       |           |                         |                             |           |                             |           |
| BMI (kg/m2)                | -0.04 (-0.05 to 0.14)                                             | 0.348     | -0.18 (0.01 to 0.38)  | 0.065     | 0.05 (-0.25 to 0.15)  | 0.605     | 0.643                   | -0.77 (-3.12 to 1.57)       | 0.708     | -0.79 (-3.07 to 1.48)       | 0.680     |
| Waist to hip ratio         | -0.01 (-0.00 to 0.39)                                             | 0.157     | 0.00 (-0.00 to 0.00)  | 0.856     | -0.01 (-0.00 to 0.02) | 0.070     | 0.018                   | -0.03 (-0.07 to -0.00)      | 0.056     | -0.03 (-0.07 to -0.00)      | 0.025     |
| Body fat (%)               | -0.08 (-0.56 to 0.72)                                             | 0.795     | -0.69 (-0.11 to 1.50) | 0.091     | -0.50 (-1.45 to 2.46) | 0.600     | 0.471                   | -1.83 (-6.41 to 2.74)       | 0.605     | -2.1 (-6.57 to 2.30)        | 0.485     |
| Blood pressure             |                                                                   |           |                       |           |                       |           |                         |                             |           |                             |           |
| SBP (mmHg)                 | -2.02 (-3.12 to 7.18)                                             | 0.423     | -3.18 (-2.33 to 8.69) | 0.246     | 0.69 (-4.64 to 3.25)  | 0.718     | 0.663                   | -3.7 (-13.8 to 6.2)         | 0.637     | -1.7 (-11.4 to 7.9)         | 0.905     |
| DBP (mmHg)                 | -1.31 (-2.08 to 4.72)                                             | 0.430     | -2.56 (0.18 to 4.93)  | 0.036     | -0.28 (-1.98 to 2.55) | 0.799     | 0.005                   | 5.5 (-0.46 to 11.4)         | 0.076     | 8.1 (2.34 to 13.9)          | 0.004     |
| Cardiovascular risk factor |                                                                   |           |                       |           |                       |           |                         |                             |           |                             |           |
| Total cholesterol (mmol/l) | -0.60 (0.39 to 0.87)                                              | 0.000     | -0.85 (0.37 to 1.34)  | 0.001     | -0.60 (0.25 to 0.95)  | 0.002     | 0.172                   | -0.21 (-1.07 to 0.63)       | 0.811     | 0.42 (-0.39 to 1.25)        | 0.433     |
| LDL-cholesterol (mmol/l)   | -0.35 (0.07 to 0.62)                                              | 0.015     | -0.58 (0.17 to 1.00)  | 0.008     | -0.29 (0.03 to 0.54)  | 0.026     | 0.277                   | -0.19 (-0.80 to 0.76)       | 0.990     | 0.43 (-.032 to 1.19)        | 0.365     |
| HDL-cholesterol (mmol/l)   | -0.25 (0.10 to 0.39)                                              | 0.002     | -0.14 (0.04 to 0.23)  | 0.005     | -0.19 (0.09 to 0.30)  | 0.001     | 0.735                   | -0.07 (-0.37 to 0.22)       | 0.822     | -0.09 (-0.38 to 0.20)       | 0.738     |
| Triglyceride (mmol/l)      | -0.31 (-0.05 to 0.68)                                             | 0.089     | -0.28 (0.02 to 0.53)  | 0.036     | -0.27 (-0.07 to 0.63) | 0.116     | 0.522                   | -0.20 (-0.98 to 0.57)       | 0.806     | 0.16 (-0.59 to 0.91)        | 0.866     |

|                        |                       |       |                       |       |                       |       |       |                       |       |                       |       |
|------------------------|-----------------------|-------|-----------------------|-------|-----------------------|-------|-------|-----------------------|-------|-----------------------|-------|
| Glucose (mmol/l)       | -0.71 (0.03 to 1.39)  | 0.042 | -0.22 (-0.45 to 0.89) | 0.507 | -0.52 (-0.43 to 1.47) | 0.269 | 0.147 | -0.53 (-1.27 to 0.20) | 0.199 | 0.01 (-0.72 to 0.70)  | 0.999 |
| Mood states            |                       |       |                       |       |                       |       |       |                       |       |                       |       |
| POMS total             | -1.36 (-3.84 to 6.56) | 0.592 | -6.5 (1.03 to 12.08)  | 0.022 | 0.13 (-4.66 to 4.40)  | 0.953 | 0.307 | -4.38 (-11.7 to 2.97) | 0.332 | -3.68 (-10.7 to 3.44) | 0.435 |
| Tension-anxiety        | 0.04 (-1.28 to 1.19)  | 0.940 | -2.20 (0.41 to 3.98)  | 0.018 | -0.39 (-0.90 to 1.68) | 0.538 | 0.319 | -1.13 (-3.06 to 0.81) | 0.348 | -0.14 (-2.01 to 1.73) | 0.983 |
| Depression-dejection   | 0.18 (-1.3 to 0.94)   | 0.740 | -1.36 (-0.23 to 2.95) | 0.092 | -0.13 (-1.27 to 1.53) | 0.849 | 0.269 | -1.22 (-3.14 to 0.69) | 0.284 | -0.99 (-2.84 to 0.87) | 0.415 |
| Fatigue-inertia        | -0.95 (-0.41 to 2.32) | 0.163 | -1.48 (0.33 to 2.62)  | 0.013 | -0.26 (-0.76 to 1.28) | 0.604 | 0.719 | -0.59 (-2.86 to 1.68) | 0.809 | -0.71 (-2.90 to 1.49) | 0.723 |
| Anger-hostility        | -0.27 (-0.89 to 1.44) | 0.633 | -1.24 (0.06 to 2.41)  | 0.039 | 1.13 (-2.64 to 0.38)  | 0.135 | 0.608 | -0.66 (-2.23 to 0.91) | 0.579 | -0.31 (-1.83 to 1.22) | 0.881 |
| Confusion-bewilderment | -0.54 (-0.64 to 1.73) | 0.352 | -1.28 (0.48 to 2.07)  | 0.003 | -0.47 (-0.85 to 1.14) | 0.149 | 0.189 | -0.11 (-1.50 to 1.72) | 0.985 | -0.98 (-2.54 to 0.58) | 0.295 |
| Vigor-activity         | -0.18 (-1.16 to 1.73) | 0.781 | 0.64 (-1.94 to 0.66)  | 0.321 | 0.17 (-1.2 to 0.86)   | 0.732 | 0.806 | -0.67 (-3.12 to 1.77) | 0.788 | -0.34 (-2.71 to 2.03) | 0.938 |
| Anxiety level          |                       |       |                       |       |                       |       |       |                       |       |                       |       |
| STAI-S (score)         | -1.86 (-0.76 to 4.49) | 0.155 | -5.28 (2.42 to 8.13)  | 0.001 | 2.29 (-5.56 to 0.77)  | 0.132 | 0.270 | 2.21 (-3.14 to 7.56)  | 0.586 | -1.35 (-6.53 to 3.83) | 0.808 |
| STAI-T (score)         | -0.81 (-2.88 to 4.51) | 0.650 | -4.28 (0.49 to 8.06)  | 0.028 | -0.78 (-1.38 to 2.91) | 0.454 | 0.625 | -2.28 (-7.90 to 3.34) | 0.597 | -1.05 (-6.49 to 4.40) | 0.890 |
| MIND diet pattern      |                       |       |                       |       |                       |       |       |                       |       |                       |       |
| Diet scores            | 3.9 (-5.14 to -2.80)  | 0.000 | 3.48 (-4.32 to -2.63) | 0.000 | 0.69 (-1.23 to -0.15) | 0.013 | 0.680 | 0.15 (-1.21 to 1.53)  | 0.960 | 1.04 (-2.37 to 0.28)  | 0.153 |

# p < 0.05 for change during the study determined by paired t-test. \* p-value were compared with one-way repeated ANOVA using Tukey HSD; BMI = body mass index; MIND group = The Mediterranean-DASH Intervention for Neurodegenerative Delay diet group; MIND-FB group = The Mediterranean-DASH Intervention for Neurodegenerative Delay (MIND) diet plus forest bathing group; DBP = diastolic blood pressure; HDL = high-density lipoprotein; HSD = honest significant difference; LDL = low-density lipoprotein; PP: Per-protocol analysis; SBP = systolic blood pressure; STAI-S = State and Trait Anxiety Inventory-State; STAI-T = State and Trait Anxiety Inventory-Trait; POMS = The Profile of Mood States.
